# Supplementary material for: The immunogenicity and protective immunity of multi-epitopes DNA prime-protein boost vaccines encoding Amastin-Kmp-11, Kmp11-Gp63 and Amastin-Gp63 against visceral leishmaniasis
Source: PubMed Central journal article supplement (PMC7075555; doi:10.1371/journal.pone.0230381), 2020-03-16

1. The raw images of Fig 2A.

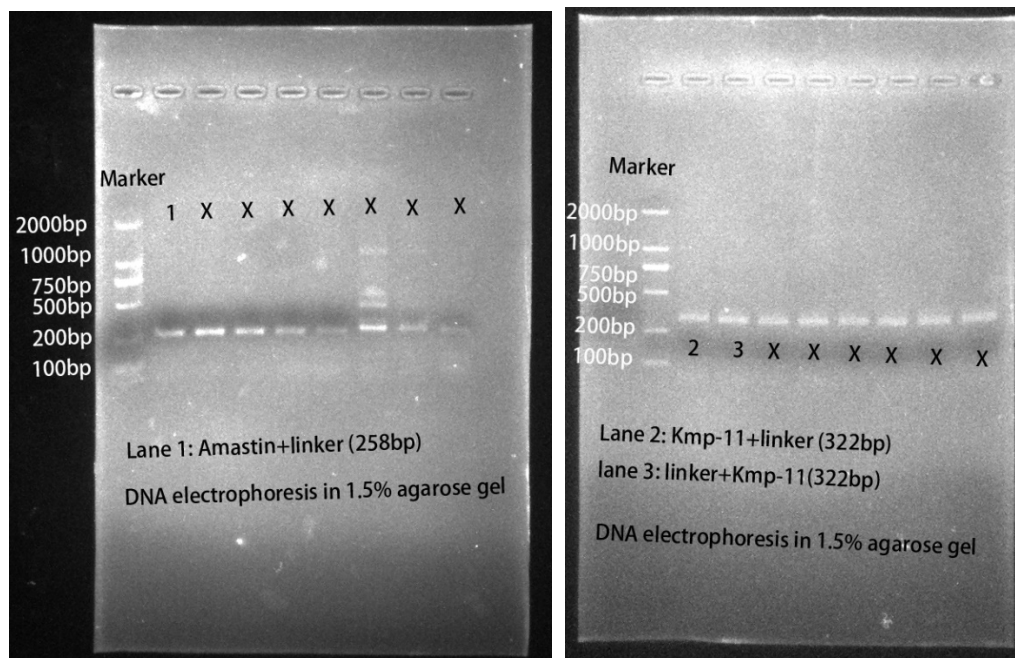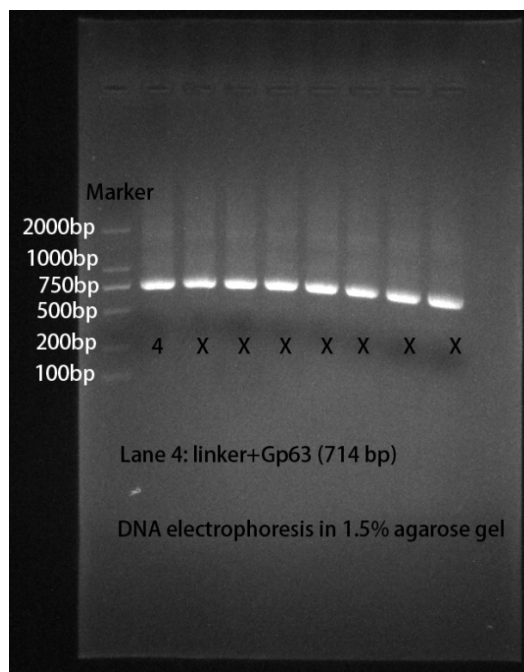

2. The raw images of Fig 2B.

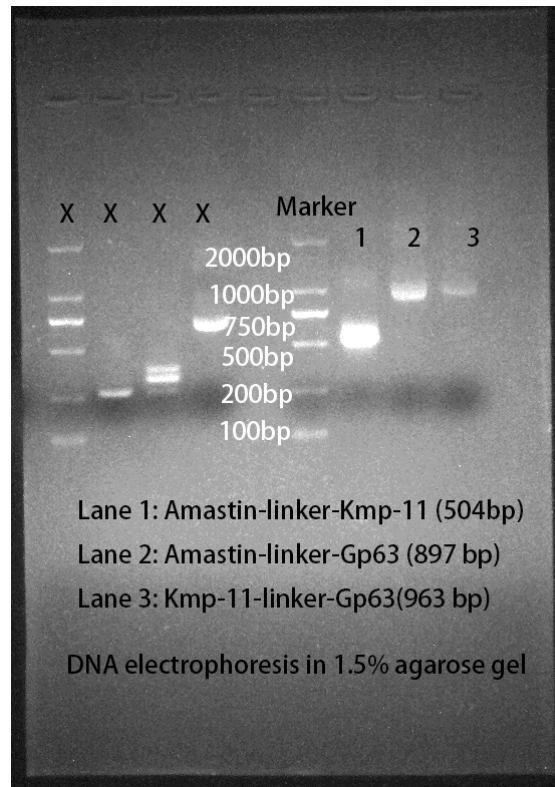

3. The raw images of Fig 2C.

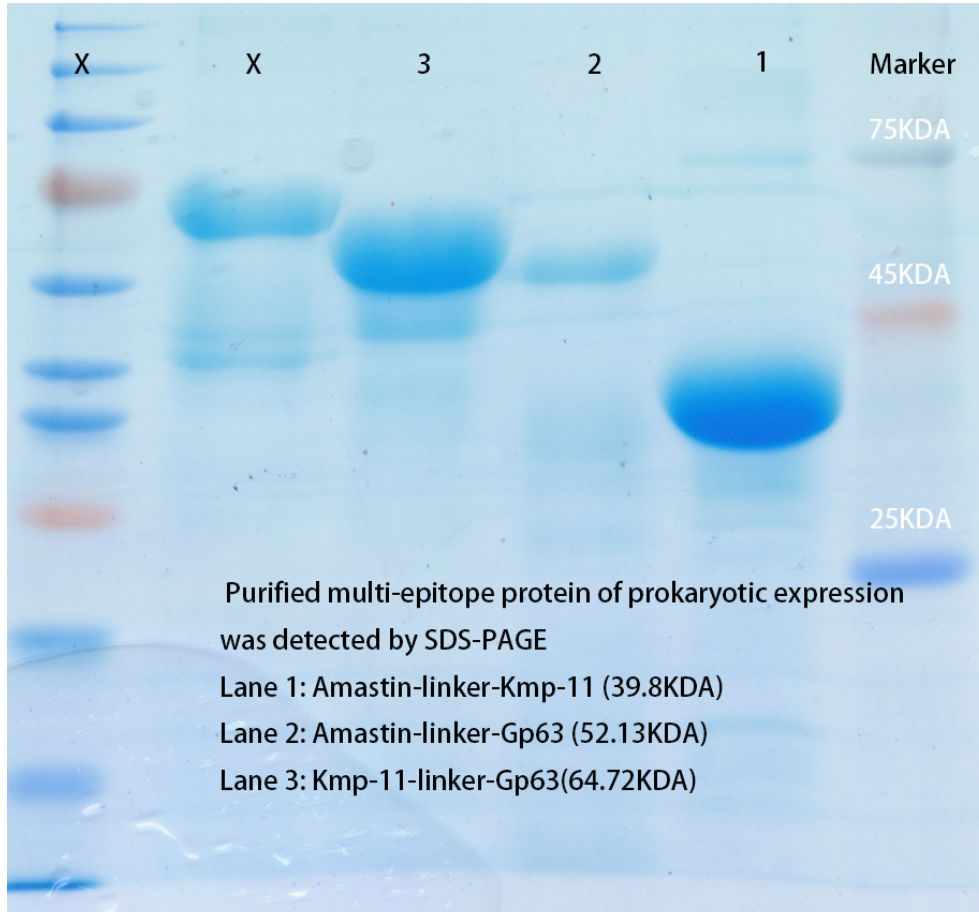

4. The raw images of Fig 2D.

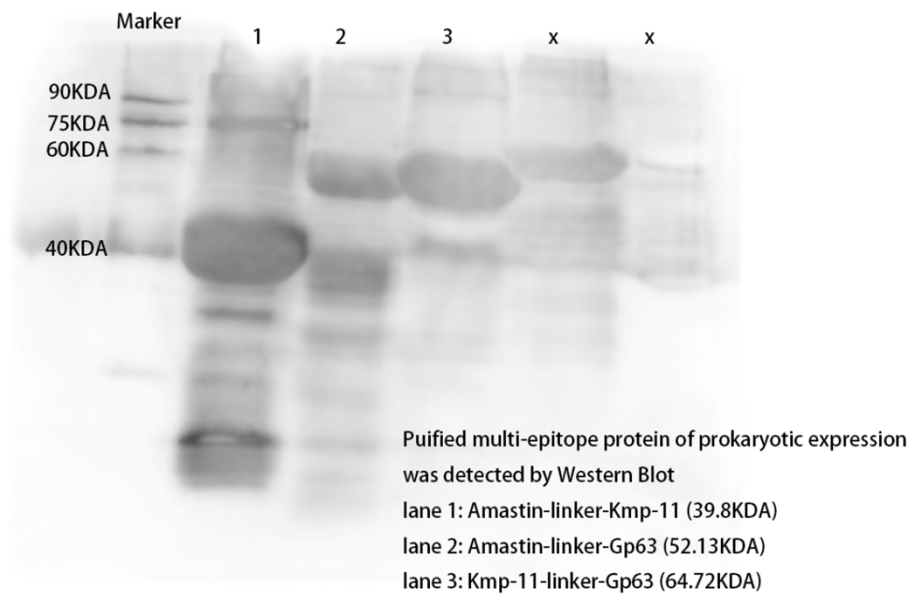

5. The raw images of Fig 2E.

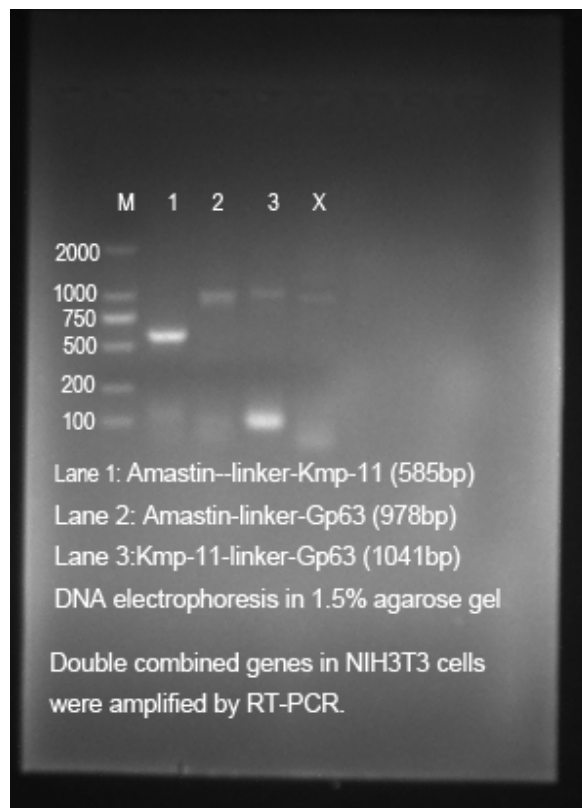

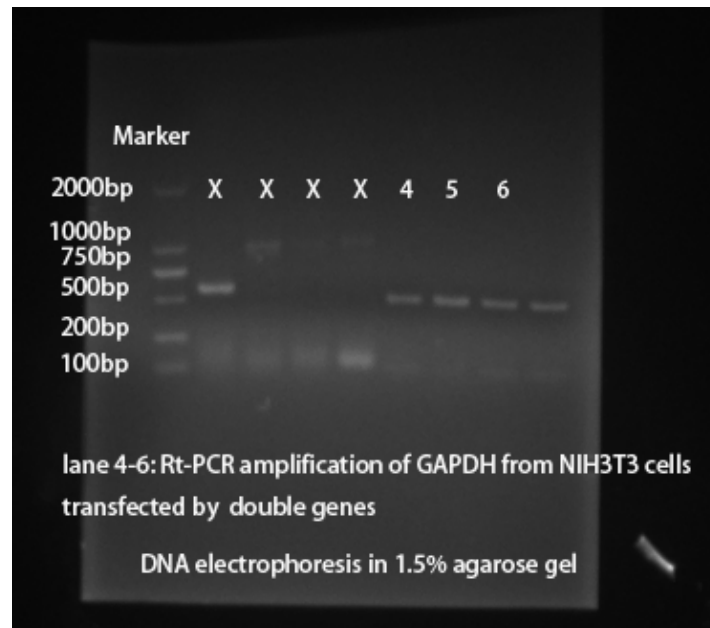

6. The raw images of Fig 2F.

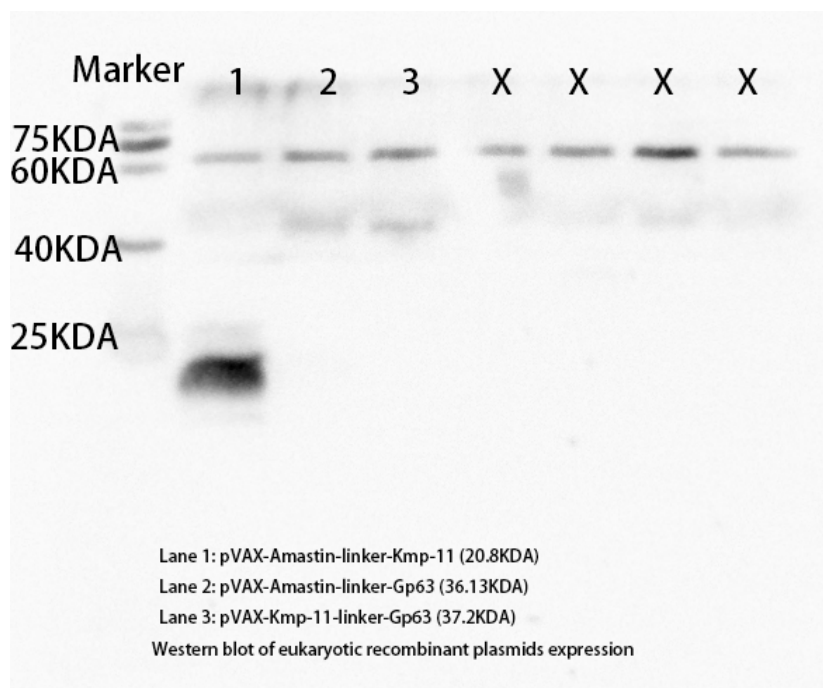

7. The raw images of Fig 2H.

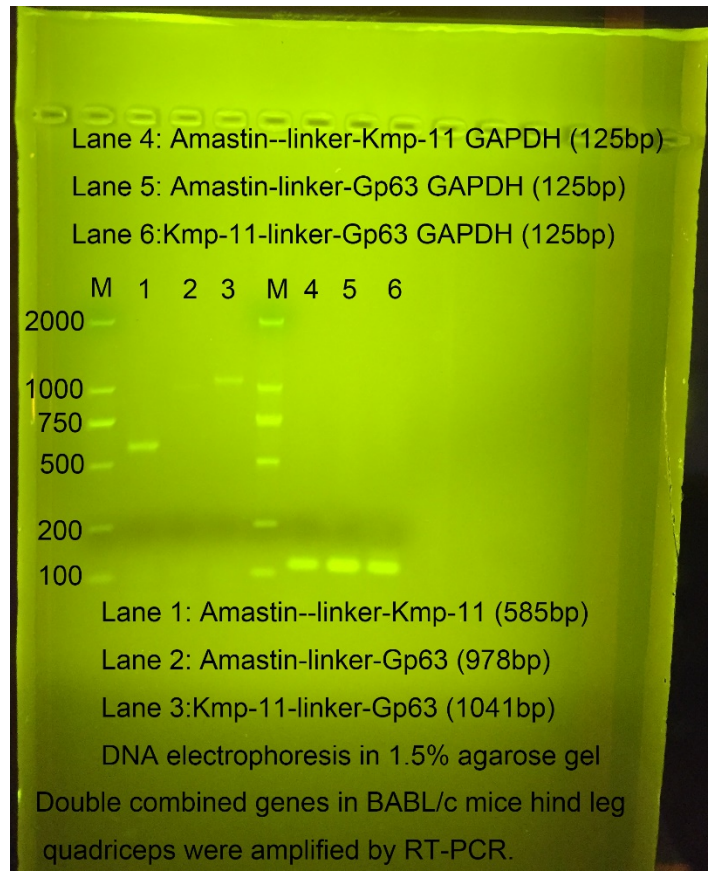

Supplement: pone.0230381.s004.pdf [file pone.0230381.s004.pdf]
